# Supplementary material for: Intragenic Copy Number Variation within Filaggrin Contributes to the Risk of Atopic Dermatitis with a Dose-Dependent Effect
Source: PubMed Central journal article supplement — J Invest Dermatol. 2011 Nov 10;132(1):98–104. doi: 10.1038/jid.2011.342 (PMC3236450; doi:10.1038/jid.2011.342), 2011-11-10
Supplement: jid2011342x1.pdf [file jid2011342x1.pdf]

## Supplementary Figures

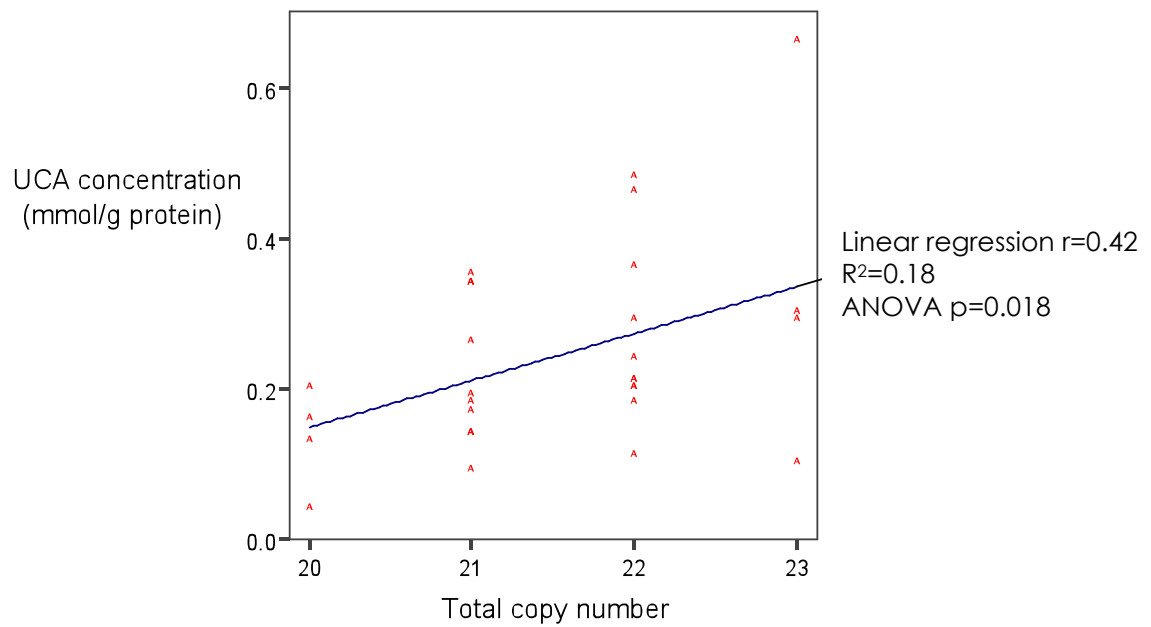

**Supplementary figure 1(a) Linear regression analysis of total copy number as a predictor of UCA concentration in tape-stripped stratum corneum samples, n=31**

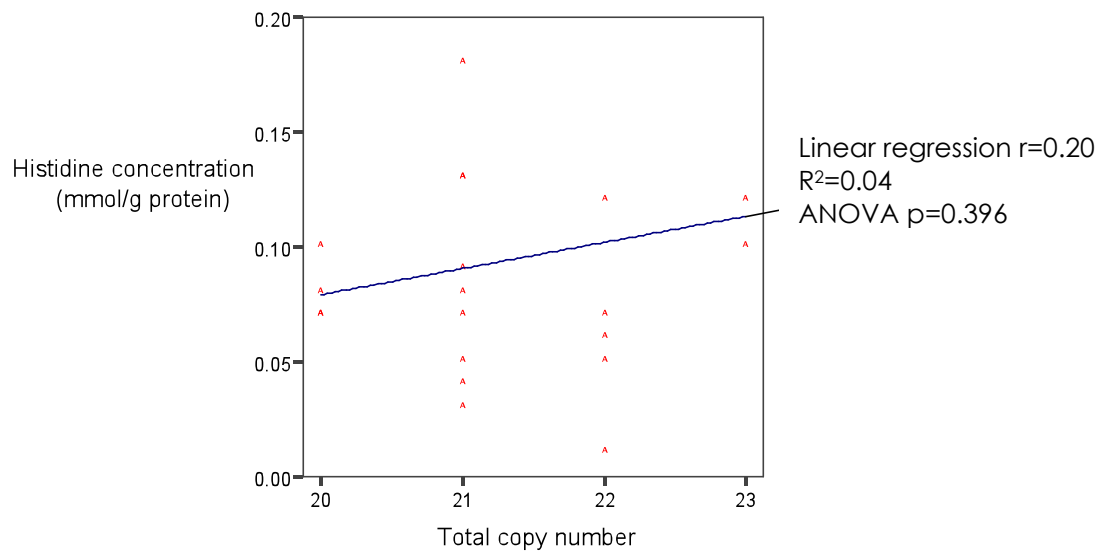

**Supplementary figure 1(b) Linear regression analysis of total copy number as a predictor of histidine concentration in tape-stripped stratum corneum samples, n=22**

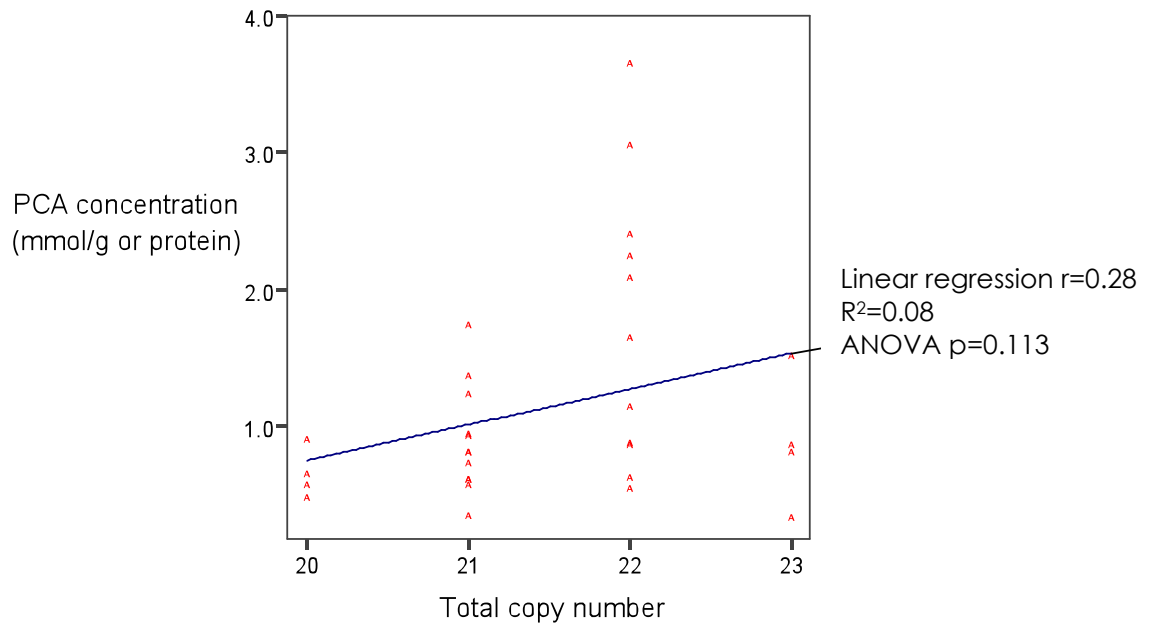

**Supplementary figure 1(c) Linear regression analysis of total copy number as a predictor of PCA concentration in tape-stripped stratum corneum samples, n=31**
